# Supplementary material for: Particulate Matter, Health Concerns and Community Perceptions of Sawmill Pollution in Ilorin West Lga, Kwara State, Nigeria
Source: Research Square preprint supplement (doi:10.21203/rs.3.rs-7465357/v1), 2025-09-08
Supplement: Supplementary file 1 [file 8729f8624494b37ba9f43856.docx]

**APPENDIX A**

**PARTICULATE MATTER, HEALTH CONCERNS & COMMUNITY PERCEPTIONS QUESTIONNAIRE**

**Study Title:** Assessing Particulate Matter Pollution, Health Effects, and Community Perceptions Among Residents Near Sawmills in Ilorin West LGA, Kwara State

**Section A: Demographic Information**

1. **Gender:**
   ☐ Male
   ☐ Female
   ☐ Other
2. **Age:**
   ☐ 18–30 years
   ☐ 31–45 years
   ☐ 46–60 years
   ☐ Above 60 years
3. **Occupation:**
   ☐ Sawmill worker
   ☐ Trader/Business
   ☐ Civil servant
   ☐ Farmer
   ☐ Other (specify): ________________________
4. **How long have you lived in this community?**
   ☐ Less than a year
   ☐ 1–5 years
   ☐ 6–10 years
   ☐ More than 10 years
5. **Distance from nearest sawmill:**
   ☐ <200 m
   ☐ 200–500 m
   ☐ 500 m–1 km
   ☐ >1 km

**Section B: Particulate Matter (PM) Pollution Exposure & Perceptions**

SD = Strongly Disagree, D = Disagree, N = Neutral, A = Agree, SA = Strongly Agree

| **Statement** | **SD** | **D** | **N** | **A** | **SA** |
| --- | --- | --- | --- | --- | --- |
| 6. I notice visible dust or smoke from sawmills in my area. | ☐ | ☐ | ☐ | ☐ | ☐ |
| 7. The air in my community often smells like burning wood or sawdust. | ☐ | ☐ | ☐ | ☐ | ☐ |

1. Sawmill pollution is worse during?

☐ Dry
☐ Rainy
☐ Both

1. How would you rate the overall air quality in your area?
   ☐ Very Poor
   ☐ Poor
   ☐ Moderate
   ☐ Good
   ☐ Excellent
2. Do you take measures to reduce exposure to sawmill pollution (e.g., closing windows, wearing masks)?
   ☐ Yes (specify): ________________________
   ☐ No

**Section C: Health Concerns Linked to Sawmill Pollution**

(Adapted from MRC Dyspnea Scale & COPD Assessment Test)

1. **In the past 6 months, have you experienced any of these symptoms?** (tick all that apply)
   ☐ Persistent cough
   ☐ Wheezing/chest tightness
   ☐ Shortness of breath
   ☐ Eye irritation
   ☐ Frequent headaches
   ☐ None
2. **How often do these symptoms occur?**
   ☐ Daily
   ☐ Weekly
   ☐ Monthly
   ☐ Rarely
3. **Have you sought medical treatment for these symptoms?**
   ☐ Yes (specify condition): ________________________
   ☐ No
4. **Do you believe sawmill pollution contributes to these health issues?**
   ☐ Strongly agree
   ☐ Agree
   ☐ Neutral
   ☐ Disagree
   ☐ Strongly disagree

**Section D: Community Perceptions & Mitigation Suggestions**

1. **How satisfied are you with government/community efforts to control sawmill pollution?**
   ☐ Very dissatisfied
   ☐ Dissatisfied
   ☐ Neutral
   ☐ Satisfied
   ☐ Very satisfied
2. **What actions would you recommend to reduce sawmill pollution?** (tick all that apply)
   ☐ Relocate sawmills away from homes
   ☐ Enforce stricter emission controls
   ☐ Plant trees as barriers
   ☐ Community awareness programmes
   ☐ Other (specify): ________________________
