# Supplementary material for: Particulate Matter, Health Concerns and Community Perceptions of Sawmill Pollution in Ilorin West Lga, Kwara State, Nigeria
Source: Research Square preprint supplement (doi:10.21203/rs.3.rs-7465357/v1), 2025-09-08
Supplement: Supplementary file 2 [file efb6dc6719e06a52418405f2.docx]

**APPENDIX B**

**INCLUSION AND EXCLUSION CRITERIA**

| **Criterion Type** | **Criterion** | **Description** | **Justification** | **Reference/Support** |
| --- | --- | --- | --- | --- |
| **Inclusion** | Age ≥18 years | Participants must be adults aged 18 years or older at the time of the survey (July 22–26, 2025). | Ensures participants are legally adults capable of providing informed consent and have the cognitive capacity to respond to complex questions about air pollution perceptions and health symptoms. Excludes minors to avoid ethical concerns regarding consent and comprehension, aligning with standard health survey protocols. | WHO (2021); Egondi et al. (2013) |
| **Inclusion** | Residency ≥1 year | Participants must have resided in Ilorin West LGA, within 5 km of a sawmill, for at least one year prior to the study. | Ensures participants have sufficient exposure to sawmill-related air pollution to experience and report associated health impacts and perceptions. Long-term residency enhances the reliability of self-reported data on chronic symptoms and environmental awareness. This criterion supports representativeness of the exposed population. | Krejcie & Morgan (1970); Adães & Pires (2019) |
| **Inclusion** | Willingness to participate | Participants must provide informed consent and be willing to complete the structured questionnaire. | Ethical requirement to ensure voluntary participation, respecting autonomy and minimizing coercion. Consent forms were available in English, Yoruba, and Hausa to accommodate the linguistic diversity of Ilorin West LGA. | Helsinki Declaration (2013); Kwara State Ministry of Health Ethics Committee (2025) |
| **Exclusion** | Age <18 years | Individuals under 18 years of age were excluded from the study. | Minors may lack the legal capacity to consent and may not fully comprehend the questionnaire, potentially leading to unreliable responses. This exclusion protects vulnerable populations and aligns with ethical guidelines for human research. | WHO (2021); Egondi et al. (2013) |
| **Exclusion** | Residency <1 year | Individuals residing in the study area for less than one year were excluded. | Short-term residents may not have sufficient exposure to sawmill pollution to report relevant health symptoms or informed perceptions, reducing data validity for assessing chronic exposure effects. | Adães & Pires (2019) |
| **Exclusion** | Non-residents of Ilorin West LGA | Individuals living outside the 5 km radius of the selected sawmills or outside Ilorin West LGA were excluded. | Ensures the study focuses on the population directly affected by sawmill-related air pollution, maintaining relevance to the study’s objectives and enhancing spatial specificity of findings. | Raimi et al. (2020) |
| **Exclusion** | Cognitive or language barriers | Individuals unable to understand or respond to the questionnaire due to cognitive impairments or language barriers (despite translations) were excluded. | Ensures data quality by including only participants who can provide accurate and meaningful responses. Trained enumerators offered translations in Yoruba and Hausa, but severe cognitive limitations could still compromise reliability. | Creswell & Plano Clark (2018) |
| **Exclusion** | Refusal to consent | Individuals who did not provide informed consent were excluded. | Adheres to ethical research standards, ensuring participation is voluntary and participants are fully informed of the study’s purpose, risks, and benefits. | Helsinki Declaration (2013) |
| **Exclusion** | Occupational exposure outside sawmills | Individuals primarily exposed to air pollution from other occupational sources (e.g., cement factories, vehicular exhaust from professional driving) were excluded. | Minimizes confounding effects of non-sawmill-related pollution sources on health symptoms and perceptions, ensuring focus on sawmill-specific exposures. | Guttikunda & Calori (2013) |
